# Supplementary material for: Evolution and Genetic Diversity of Primate Cytomegaloviruses
Source: PubMed Central journal article supplement (PMC7285053; doi:10.3390/microorganisms8050624), 2020-04-25
Supplement: microorganisms-08-00624-s001.pdf [file microorganisms-08-00624-s001.pdf]

**Supplementary Table 1: List of HCMV strains analyzed in this study.**

| <b>Strain name</b> | <b>GenBank ID</b> | <b>Mutated genes</b>       |
|--------------------|-------------------|----------------------------|
| 3301*              | GQ466044          |                            |
| AF1*               | GU179291          | <i>RL6, UL9</i>            |
| BE/21/2010*        | KC519322          | <i>RL5A, UL9, UL150</i>    |
| HANChild1*         | KY490071          | <i>RL5A</i>                |
| HANChild2&3*       | KY490072          | <i>RL5A, US9</i>           |
| HANChild4*         | KY123649          |                            |
| HANRTR10*          | KY490078          | <i>UL1, US7</i>            |
| HANRTR1A*          | KY490073          | <i>UL9, US6</i>            |
| HANRTR1B*          | KY490074          |                            |
| HANRTR2*           | KY123650          |                            |
| HANRTR4*           | KY123651          | <i>UL1</i>                 |
| HANRTR5*           | KY123652          |                            |
| HANRTR6*           | KY490075          |                            |
| HANRTR8*           | KY490076          | <i>RL6, UL9, UL30, US8</i> |
| HANRTR9*           | KY490077          | <i>UL1, UL9</i>            |
| HANSCTR10*         | KY490084          | <i>RL1, RL6, UL142</i>     |
| HANSCTR11A*        | KY490085          | <i>UL9</i>                 |
| HANSCTR11B*        | KY490086          | <i>RL5A, RL6</i>           |
| HANSCTR12*         | KY490087          | <i>UL1</i>                 |
| HANSCTR13*         | KY490088          | <i>UL1</i>                 |
| HANSCTR1A*         | KY490079          | <i>UL43, US7</i>           |
| HANSCTR1B*         | KY490080          | <i>RL5A</i>                |
| HANSCTR2*          | KY490081          | <i>RL5A, UL9</i>           |
| HANSCTR4*          | KY123653          | <i>UL1, UL9</i>            |
| HANSCTR8*          | KY490082          | <i>UL1</i>                 |
| HANSCTR9*          | KY490083          |                            |
| JER1070*           | KR534199          |                            |
| JER2002*           | KR534201          | <i>RL5A, UL9</i>           |
| JER2282*           | KR534202          | <i>RL6</i>                 |
| JER3230*           | KR534203          | <i>UL9</i>                 |
| JER3855*           | KR534204          | <i>RL5A</i>                |
| JER4035*           | KR534205          |                            |
| JER4041*           | KR534206          | <i>UL111A</i>              |
| JER4053*           | KR534207          |                            |
| JER4559*           | KR534208          | <i>RL5A, UL9</i>           |
| JER4755*           | KR534209          | <i>RL5A, UL9, UL40</i>     |
| JER5268*           | KR534210          | <i>RL5A, UL1, US7</i>      |
| JER5409*           | KR534211          |                            |
| JER5550*           | KR534212          | <i>RL6, UL9</i>            |
| JER5695*           | KR534213          | <i>UL9, UL111A</i>         |
| JHC*               | HQ380895          | <i>UL140, UL1, UL131A</i>  |
| JP*                | GQ221975          | <i>RL5A, UL111A</i>        |
| LUS193*            | MK290742          |                            |
| LUS243*            | MK422176          |                            |
| LUS248*            | MK290743          |                            |
| LUS283*            | MK290744          |                            |

|                     |          |                                                                          |
|---------------------|----------|--------------------------------------------------------------------------|
| NAN1LA*             | KU550087 | <i>RL6, US9</i>                                                          |
| NAN2LA*             | KU550088 |                                                                          |
| NAN4LA*             | KU550089 | <i>RL6, UL9, US9</i>                                                     |
| NANU*               | KU550090 | <i>RL5A</i>                                                              |
| PAV1*               | KJ361959 | <i>RL5A</i>                                                              |
| PAV11*              | KJ361965 |                                                                          |
| PAV12*              | KJ361966 | <i>RL5A</i>                                                              |
| PAV16*              | KJ872539 | <i>RL5A, UL9, UL111A</i>                                                 |
| PAV18*              | KJ872540 |                                                                          |
| PAV20*              | KJ872541 | <i>RL5A</i>                                                              |
| PAV21*              | KJ872542 | <i>UL1, UL9, RNA4.9</i>                                                  |
| PAV23*              | KJ361967 | <i>RL1, RL5A</i>                                                         |
| PAV24*              | KJ361968 | <i>RL5A</i>                                                              |
| PAV25*              | KJ361969 | <i>UL9, UL150</i>                                                        |
| PAV26*              | KJ361970 | <i>UL1, UL9</i>                                                          |
| PAV31*              | KY490061 | <i>RL5A, UL13</i>                                                        |
| PAV32*              | KY490062 | <i>RL6</i>                                                               |
| PAV4*               | KJ361960 | <i>RL5A, UL150, US7</i>                                                  |
| PAV5*               | KJ361961 | <i>US8</i>                                                               |
| PAV6*               | KJ361962 | <i>RL1, US7</i>                                                          |
| PAV7*               | KJ361963 | <i>US7</i>                                                               |
| PAV8*               | KJ361964 | <i>UL9</i>                                                               |
| PRA1*               | KY490063 | <i>UL1, UL9</i>                                                          |
| PRA2*               | KY490064 | <i>UL1, UL9, UL15A</i>                                                   |
| PRA3*               | KY490065 | <i>UL1</i>                                                               |
| PRA4*               | KY490066 |                                                                          |
| PRA5*               | KY490067 | <i>UL1, UL9, UL30, UL111A</i>                                            |
| PRA6*               | KY490068 | <i>RL5A, UL1, UL9</i>                                                    |
| PRA7*               | KY490069 | <i>RL5A, UL111A</i>                                                      |
| PRA8*               | KY490070 |                                                                          |
| U11*                | GU179290 | <i>UL9</i>                                                               |
| U8*                 | GU179288 |                                                                          |
| UK/Lon1/Blood/2013* | KT726947 |                                                                          |
| UK/Lon6/Urine/2011* | KT726949 |                                                                          |
| UK/Lon7/Urine/2011* | KT726950 |                                                                          |
| UK/Lon8/Urine/2012* | KT726951 |                                                                          |
| UKNEQAS2*           | KT634296 | <i>RL6, RL9</i>                                                          |
| VR1814*             | GU179289 |                                                                          |
| 3157                | GQ221974 | <i>RL13, UL40, UL128</i>                                                 |
| 6397                | JX512197 | <i>RL13, UL9, UL130, UL131A, IRS1, US1, US2, US3, US6, US7, US8, US9</i> |
| 2CEN15              | KJ361948 | <i>UL97</i>                                                              |
| 2CEN2               | KJ361946 | <i>UL1, UL9</i>                                                          |
| 2CEN30              | KJ361949 | <i>UL1, UL9, UL14</i>                                                    |
| 2CEN5               | KJ361947 | <i>RL5A</i>                                                              |
| AD169               | FJ527563 | <i>UL144, UL142, UL141, UL140, RL5A, RL13, UL131A, IRS1, US1, US2</i>    |
| BE/1/2010           | KP745677 | <i>RL5A, US9</i>                                                         |
| BE/1/2011           | KP745650 | <i>UL1, UL9</i>                                                          |
| BE/1/2012           | KP745699 | <i>UL1, UL136</i>                                                        |

|            |          |                        |
|------------|----------|------------------------|
| BE/10/2010 | KC519320 | UL9                    |
| BE/10/2011 | KP745639 | UL1                    |
| BE/10/2012 | KP745649 |                        |
| BE/11/2010 | KC519321 | RL5A, UL1              |
| BE/11/2011 | KP745684 | RL6                    |
| BE/11/2012 | KP745680 | UL150                  |
| BE/12/2010 | KP745694 | RL5A                   |
| BE/12/2011 | KP745683 | R, US9                 |
| BE/12/2012 | KP745688 | RL6                    |
| BE/13/2010 | KP745645 | US9                    |
| BE/13/2011 | KP745657 | RL5A, UL1, UL9, US7    |
| BE/13/2012 | KP745707 | UL9                    |
| BE/14/2010 | KP745721 | RL6, UL9, UL40         |
| BE/14/2011 | KP745671 | UL9, UL11, US6         |
| BE/14/2012 | KP745658 | RL6, UL9, US7          |
| BE/15/2010 | KP745638 | RL1, UL9, UL111A       |
| BE/15/2011 | KP745720 | RL5A, UL9              |
| BE/15/2012 | KP745693 | UL150, US7             |
| BE/16/2010 | KP745716 | UL1, UL111A, US9       |
| BE/16/2012 | KP745665 | UL150                  |
| BE/17/2010 | KP745727 | RL5A, RL12, UL111A     |
| BE/17/2011 | KP745689 | UL1, UL9               |
| BE/18/2010 | KP745647 |                        |
| BE/18/2011 | KP745668 |                        |
| BE/19/2010 | KP745712 | UL9, UL136             |
| BE/19/2011 | KP745654 | RL6, UL9               |
| BE/2/2010  | KP745717 | UL9, UL111A            |
| BE/2/2011  | KP745652 |                        |
| BE/2/2012  | KP745710 | RL5A, UL133            |
| BE/2/2013  | KP745656 | RL5A, UL128, US9       |
| BE/20/2010 | KP745662 | UL9                    |
| BE/20/2011 | KP745698 | US7                    |
| BE/21/2011 | KP745702 |                        |
| BE/22/2010 | KP745640 |                        |
| BE/22/2011 | KP745653 | RL6, UL9               |
| BE/23/2010 | KP745697 | UL1, UL9               |
| BE/23/2011 | KP745675 | UL9                    |
| BE/24/2010 | KP745679 | UL9                    |
| BE/24/2011 | KP745711 |                        |
| BE/25/2010 | KP745678 | UL111A                 |
| BE/26/2010 | KP745719 | UL150                  |
| BE/26/2011 | KP745703 |                        |
| BE/27/2010 | KC519323 | RL5A, UL1, UL9, UL111A |
| BE/27/2011 | KP745696 | UL9                    |
| BE/28/2010 | KP745676 | RL5A, UL9              |
| BE/28/2011 | KP745669 | UL40                   |
| BE/29/2010 | KP745714 |                        |
| BE/29/2011 | KP745672 | RL5A, UL9              |
| BE/3/2010  | KP745655 | RL5A, UL9              |
| BE/3/2011  | KP745659 |                        |

|            |          |                                                               |
|------------|----------|---------------------------------------------------------------|
| BE/3/2012  | KP745692 | <i>US13</i>                                                   |
| BE/30/2010 | KP745726 | <i>US9, US27</i>                                              |
| BE/30/2011 | KP745670 | <i>UL150</i>                                                  |
| BE/31/2010 | KP745644 |                                                               |
| BE/31/2011 | KP745641 |                                                               |
| BE/32/2010 | KP745634 | <i>RL5A, US9</i>                                              |
| BE/32/2011 | KP745704 | <i>UL150</i>                                                  |
| BE/33/2010 | KP745661 | <i>RL6, UL9, US9</i>                                          |
| BE/33/2011 | KP745674 |                                                               |
| BE/34/2011 | KP745690 |                                                               |
| BE/35/2011 | KP745713 | <i>UL142, US9</i>                                             |
| BE/36/2011 | KP745687 | <i>RL6, UL9, UL40</i>                                         |
| BE/37/2011 | KP745723 | <i>RL6</i>                                                    |
| BE/38/2011 | KP745705 | <i>RL6, UL9</i>                                               |
| BE/39/2011 | KP745686 | <i>UL9, UL111A, US9</i>                                       |
| BE/4/2010  | KP745728 | <i>RL5A, UL111A</i>                                           |
| BE/4/2011  | KP745700 |                                                               |
| BE/4/2012  | KP745724 | <i>RL5A</i>                                                   |
| BE/40/2011 | KP745722 | <i>RL6</i>                                                    |
| BE/41/2011 | KP745706 | <i>UL9, UL111A</i>                                            |
| BE/42/2011 | KP745673 | <i>RL5A</i>                                                   |
| BE/43/2011 | KP745681 | <i>RL5A, RL6, UL133</i>                                       |
| BE/44/2011 | KP745715 | <i>RL5A, UL150A, IRS1, US9</i>                                |
| BE/45/2011 | KP745633 |                                                               |
| BE/46/2011 | KP745682 | <i>US9</i>                                                    |
| BE/48/2011 | KP745709 | <i>UL40 US9</i>                                               |
| BE/49/2011 | KP745725 | <i>RL5A</i>                                                   |
| BE/5/2010  | KP745663 | <i>RL6, US9</i>                                               |
| BE/5/2011  | KP745667 |                                                               |
| BE/5/2012  | KP745635 |                                                               |
| BE/6/2010  | KP745701 | <i>RL5A, UL9, US7</i>                                         |
| BE/6/2011  | KP745660 | <i>UL9</i>                                                    |
| BE/6/2012  | KP745695 | <i>RL6, US9, US27</i>                                         |
| BE/7/2011  | KP745636 | <i>RL12, UL148</i>                                            |
| BE/7/2012  | KP745666 | <i>UL150</i>                                                  |
| BE/8/2010  | KP745708 | <i>UL9</i>                                                    |
| BE/8/2011  | KP745648 | <i>US9</i>                                                    |
| BE/8/2012  | KP745646 | <i>RL13</i>                                                   |
| BE/9/2010  | KC519319 |                                                               |
| BE/9/2011  | KP745637 | <i>UL9</i>                                                    |
| BE/9/2012  | KP745651 | <i>UL1, UL9</i>                                               |
| CZ/1/2011  | KP745718 | <i>UL9</i>                                                    |
| CZ/1/2012  | KP745642 | <i>UL9</i>                                                    |
| CZ/1/2013  | KP745691 | <i>UL111A</i>                                                 |
| CZ/2/2012  | KP745643 | <i>US13</i>                                                   |
| CZ/2/2013  | KP745664 | <i>RL6, UL9, UL40</i>                                         |
| CZ/3/2012  | KP745685 | <i>UL145</i>                                                  |
| Davis      | JX512198 | <i>RL5A, RL12, RL13, UL1, UL2, UL4, UL5, UL6, UL99, UL130</i> |
| DB         | KT959235 | <i>RL13, UL9</i>                                              |
| HAN1       | JX512199 |                                                               |

|                    |           |                                           |
|--------------------|-----------|-------------------------------------------|
| HAN11              | KJ361950  | <i>RL5A, UL150, US9</i>                   |
| HAN12              | JX512203  | <i>UL9</i>                                |
| HAN13              | GQ221973  | <i>RL5A</i>                               |
| HAN16              | JX512204  | <i>US7, US12</i>                          |
| HAN19              | JX512205  | <i>RL5A</i>                               |
| HAN2               | JX512200  | <i>UL1, UL6, UL7, UL8, UL9, UL30, US7</i> |
| HAN20              | GQ396663  |                                           |
| HAN21              | KJ361951  |                                           |
| HAN22              | JX512206  |                                           |
| HAN27              | KJ361952  | <i>RL12, UL133</i>                        |
| HAN28              | JX512207  |                                           |
| HAN3               | JX512201  |                                           |
| HAN30              | KJ361953  |                                           |
| HAN31              | JX512208  | <i>UL1</i>                                |
| HAN32              | KJ361954  | <i>UL9</i>                                |
| HAN33              | KJ361955  | <i>UL9</i>                                |
| HAN36              | KJ361956  | <i>UL20</i>                               |
| HAN38              | GQ396662  | <i>RL6, US9</i>                           |
| HAN39              | KJ361957  | <i>UL1</i>                                |
| HAN40              | KJ361958  | <i>RL1, US13</i>                          |
| HAN8               | JX512202  | <i>UL111A</i>                             |
| JER1289            | KR534200  |                                           |
| JER847             | KR534196  | <i>RL6</i>                                |
| JER851             | KR534197  | <i>UL1, UL9, UL111A</i>                   |
| JER893             | KR534198  | <i>UL1, UL150</i>                         |
| Merlin             | NC_006273 | <i>UL128</i>                              |
| NL/Rot6/Nasal/2012 | KT726945  |                                           |
| NR                 | KX544831  |                                           |
| SUB_22             | KX544834  |                                           |
| SUB_24             | KX544832  |                                           |
| TB40/E             | KF297339  | <i>RL13, UL128, IRS1, US1, US2</i>        |
| TB40-E_UNC         | KX544839  |                                           |
| Towne              | FJ616285  | <i>RL13, UL1, UL40, UL130, US1</i>        |
| TR                 | KF021605  |                                           |
| UKNEQAS1           | KJ361971  | <i>RL5A</i>                               |
| VR3908             | KX544833  |                                           |
| VR5022             | KX544835  |                                           |
| VR5235             | KX544837  |                                           |
| VR7863             | KX544838  |                                           |

Note: asterisk denotes unpassaged strains.
